# Supplementary material for: VSV-Displayed HIV-1 Envelope Identifies Broadly Neutralizing Antibodies Class-Switched to IgG and IgA
Source: PubMed Central journal article supplement (PMC7294236; doi:10.1016/j.chom.2020.03.024), 2020-06-10
Supplement: mmc1.pdf [file mmc1.pdf]

**Cell Host & Microbe, Volume 27**

## **Supplemental Information**

### **VSV-Displayed HIV-1 Envelope Identifies**

### **Broadly Neutralizing Antibodies**

### **Class-Switched to IgG and IgA**

**Manxue Jia, Rachel A. Liberatore, Yicheng Guo, Kun-Wei Chan, Ruimin Pan, Hong Lu, Eric Waltari, Eva Mittler, Kartik Chandran, Andrés Finzi, Daniel E. Kaufmann, Michael S. Seaman, David D. Ho, Lawrence Shapiro, Zizhang Sheng, Xiang-Peng Kong, Paul D. Bieniasz, and Xueling Wu**

**Table S1. Neutralization IC<sub>50</sub> (μg/mL) of bNAbs (expressed as IgG1 or otherwise indicated) against 120 HIV-1 Env pseudoviruses. Related to Figure 1.**

| Virus              | Clade   | M4008 |            | M1214 |       | M1214 |       |
|--------------------|---------|-------|------------|-------|-------|-------|-------|
|                    |         | N1    | N1.3 dIgA2 | N1    | N1.2  | N2    | N2.2  |
| MS208.A1           | A       | >50   | >50        | 40.2  | 0.090 | >50   | >50   |
| Q23.17             | A       | 0.170 | 0.261      | 1.3   | 0.182 | >50   | >50   |
| Q461.e2            | A       | 23.0  | >50        | 3.0   | 11.4  | >50   | >50   |
| Q769.d22           | A       | >50   | >50        | >50   | >50   | >50   | >50   |
| Q259.d2.17         | A       | 10.8  | >50        | >50   | >50   | >50   | >50   |
| Q842.d12           | A       | 0.082 | 0.414      | >50   | >50   | 0.916 | >50   |
| 0260.v5.c36        | A       | >50   | >50        | >50   | >50   | >50   | 26.2  |
| 191955_A11         | A (T/F) | 4.0   | 35.1       | 0.205 | 27.1  | >50   | >50   |
| 191084 B7-19       | A (T/F) | >50   | >50        | 0.030 | 0.023 | 0.020 | 0.107 |
| 9004SS_A3_4        | A (T/F) | 2.0   | >50        | 0.738 | 1.4   | 0.008 | 35.3  |
| BG505              | A (T/F) | 0.112 | 0.865      | >50   | 0.238 | >50   | 0.518 |
| 6535.3             | B       | 1.2   | 36.2       | >50   | >50   | >50   | >50   |
| QH0692.42          | B       | 0.203 | 0.096      | 0.045 | 0.035 | 0.111 | >50   |
| SC422661.8         | B       | >50   | >50        | 0.016 | 0.070 | 0.018 | 0.026 |
| PVO.4              | B       | 0.160 | 0.132      | 0.192 | 2.9   | 0.019 | 0.420 |
| TRO.11             | B       | 0.124 | 7.4        | >50   | >50   | 0.027 | 0.017 |
| AC10.0.29          | B       | 1.1   | >50        | 0.067 | 0.063 | >50   | 1.3   |
| RHPA4259.7         | B       | 0.815 | >50        | 0.004 | 0.011 | 0.364 | >50   |
| THRO4156.18        | B       | >50   | >50        | >50   | 21.1  | >50   | >50   |
| REJO4541.67        | B       | 0.133 | 0.152      | 0.015 | 0.145 | >50   | 48.1  |
| TRJO4551.58        | B       | >50   | >50        | 10.2  | 0.025 | >50   | >50   |
| WITO4160.33        | B       | 0.197 | >50        | 0.093 | 0.263 | 0.083 | >50   |
| CAANS342.A2        | B       | >50   | >50        | 0.024 | 44.3  | >50   | >50   |
| JR-FL              | B       | 0.004 | 0.019      | 0.009 | 0.096 | 0.019 | 0.027 |
| Yu2                | B       | 0.163 | 0.186      | 0.026 | 0.109 | 0.114 | 0.035 |
| BL01               | B       | >50   | >50        | >50   | >50   | 4.0   | 0.070 |
| WEAU_d15_410_5017  | B (T/F) | >50   | >50        | >50   | 0.336 | 0.059 | 0.041 |
| 1006_11_C3_1601    | B (T/F) | 0.109 | >50        | 0.016 | 0.027 | 0.090 | >50   |
| 1054_07_TC4_1499   | B (T/F) | >50   | >50        | 0.046 | 0.374 | >50   | >50   |
| 1056_10_TA11_1826  | B (T/F) | 0.177 | 0.070      | 0.271 | 1.2   | >50   | >50   |
| 1012_11_TC21_3257  | B (T/F) | 0.055 | 0.612      | 0.063 | 0.990 | 0.058 | 0.009 |
| 6240_08_TA5_4622   | B (T/F) | 13.0  | >50        | 0.986 | 29.3  | 0.030 | 0.020 |
| 6244_13_B5_4576    | B (T/F) | 1.0   | 1.6        | 0.724 | 0.815 | >50   | 0.060 |
| 62357_14_D3_4589   | B (T/F) | 8.6   | >50        | 0.036 | 0.404 | 0.915 | 1.1   |
| SC05_8C11_2344     | B (T/F) | >50   | >50        | 6.4   | 1.2   | 0.014 | 0.012 |
| AD17               | B (T/F) | 0.295 | 0.342      | 0.039 | 0.532 | 0.181 | >50   |
| Du156.12           | C       | >50   | >50        | >50   | >50   | >50   | >50   |
| Du172.17           | C       | >50   | >50        | >50   | 0.468 | >50   | >50   |
| Du422.1            | C       | >50   | >50        | >50   | >50   | >50   | >50   |
| ZM197M.PB7         | C       | 2.6   | 9.2        | >50   | >50   | >50   | 18.1  |
| ZM214M.PL15        | C       | >50   | >50        | 16.0  | 20.2  | >50   | >50   |
| ZM233M.PB6         | C       | >50   | 43.5       | 14.2  | >50   | >50   | >50   |
| ZM249M.PL1         | C       | >50   | >50        | >50   | >50   | >50   | >50   |
| ZM53M.PB12         | C       | >50   | >50        | 24.3  | 0.285 | >50   | >50   |
| ZM109F.PB4         | C       | 0.046 | 0.741      | >50   | >50   | >50   | >50   |
| ZM135M.PL10a       | C       | >50   | >50        | >50   | >50   | >50   | >50   |
| CAP45.2.00.G3      | C       | >50   | >50        | >50   | >50   | >50   | >50   |
| CAP210.2.00.E8     | C       | >50   | >50        | >50   | >50   | >50   | >50   |
| HIV-001428-2.42    | C       | 0.762 | 0.578      | 0.457 | 0.104 | >50   | >50   |
| HIV-0013095-2.11   | C       | >50   | >50        | >50   | >50   | >50   | >50   |
| HIV-16055-2.3      | C       | >50   | >50        | >50   | >50   | >50   | >50   |
| HIV-16845-2.22     | C       | >50   | >50        | >50   | >50   | >50   | >50   |
| Ce1086_B2          | C (T/F) | 13.1  | >50        | 2.5   | 11.7  | >50   | >50   |
| Ce0393_C3          | C (T/F) | >50   | >50        | >50   | >50   | >50   | >50   |
| Ce1176_A3          | C (T/F) | >50   | >50        | 0.463 | 32.3  | >50   | >50   |
| Ce2010_F5          | C (T/F) | 9.1   | >50        | 0.601 | 0.081 | >50   | >50   |
| Ce0682_E4          | C (T/F) | >50   | 27.4       | >50   | >50   | >50   | >50   |
| Ce1172_H1          | C (T/F) | 17.8  | 12.4       | >50   | >50   | >50   | >50   |
| Ce2060_G9          | C (T/F) | >50   | >50        | 0.019 | 0.084 | >50   | >50   |
| Ce703010054_2A2    | C (T/F) | >50   | >50        | >50   | 14.8  | >50   | >50   |
| BF1266.431a        | C (T/F) | 1.1   | 1.5        | >50   | >50   | >50   | >50   |
| 246F C1G           | C (T/F) | 0.028 | 1.5        | >50   | 0.529 | >50   | >50   |
| 249M B10           | C (T/F) | >50   | >50        | >50   | 7.2   | >50   | >50   |
| ZM247v1(Rev-)      | C (T/F) | >50   | >50        | 0.100 | 3.6   | >50   | >50   |
| 7030102001E5(Rev-) | C (T/F) | >50   | >50        | 11.3  | 2.6   | 0.008 | 0.023 |
| 1394C9G1(Rev-)     | C (T/F) | >50   | >50        | >50   | >50   | >50   | >50   |
| Ce704809221_1B3    | C (T/F) | 2.5   | >50        | >50   | >50   | >50   | >50   |

**Table S1. Neutralization IC<sub>50</sub> (µg/mL) of bNAbs (expressed as IgG1 or otherwise indicated) against 120 HIV-1 Env pseudoviruses. Related to Figure 1. *Continued.***

| Virus                               | Clade          | M4008           |                 | M1214           |                 | M1214           |                 |
|-------------------------------------|----------------|-----------------|-----------------|-----------------|-----------------|-----------------|-----------------|
|                                     |                | N1              | N1.3 dIgA2      | N1              | N1.2            | N2              | N2.2            |
| CNE19                               | BC             | 0.269           | 0.156           | 0.008           | 0.024           | >50             | >50             |
| CNE20                               | BC             | >50             | >50             | 3.3             | >50             | >50             | >50             |
| CNE21                               | BC             | >50             | >50             | 0.038           | 47.5            | >50             | >50             |
| CNE17                               | BC             | >50             | 13.1            | 0.075           | 0.238           | >50             | >50             |
| CNE30                               | BC             | >50             | >50             | 0.963           | 2.8             | >50             | >50             |
| CNE52                               | BC             | >50             | >50             | >50             | >50             | >50             | >50             |
| CNE53                               | BC             | >50             | >50             | 22.8            | 3.6             | >50             | >50             |
| CNE58                               | BC             | 22.2            | 0.284           | >50             | 45.3            | >50             | >50             |
| 620345.c01                          | CRF01_AE       | >50             | >50             | >50             | >50             | >50             | >50             |
| C1080.c03                           | CRF01_AE       | >50             | >50             | >50             | >50             | >50             | >50             |
| R2184.c04                           | CRF01_AE       | >50             | >50             | 0.008           | 0.099           | >50             | >50             |
| R1166.c01                           | CRF01_AE       | >50             | >50             | 7.9             | >50             | >50             | >50             |
| R3265.c06                           | CRF01_AE       | >50             | >50             | 0.230           | >50             | >50             | >50             |
| C2101.c01                           | CRF01_AE       | >50             | >50             | 0.006           | 0.123           | >50             | >50             |
| C3347.c11                           | CRF01_AE       | >50             | >50             | 0.517           | >50             | >50             | >50             |
| C4118.c09                           | CRF01_AE       | >50             | >50             | 6.9             | 30.0            | >50             | >50             |
| CNE5                                | CRF01_AE       | >50             | >50             | 0.973           | 0.255           | >50             | >50             |
| BJOX009000.02.4                     | CRF01_AE       | >50             | >50             | 13.6            | 3.3             | >50             | >50             |
| BJOX015000.11.5                     | CRF01_AE (T/F) | >50             | >50             | 0.056           | 0.323           | >50             | >50             |
| BJOX010000.06.2                     | CRF01_AE (T/F) | >50             | >50             | 0.023           | 0.072           | >50             | >50             |
| BJOX025000.01.1                     | CRF01_AE (T/F) | >50             | >50             | 0.008           | 0.098           | >50             | >50             |
| BJOX028000.10.3                     | CRF01_AE (T/F) | >50             | >50             | 0.040           | >50             | >50             | >50             |
| T257-31                             | CRF02_AG       | >50             | >50             | 4.6             | >50             | >50             | >50             |
| 928-28                              | CRF02_AG       | >50             | >50             | >50             | >50             | >50             | >50             |
| 263-8                               | CRF02_AG       | >50             | >50             | >50             | >50             | 0.770           | >50             |
| T250-4                              | CRF02_AG       | >50             | >50             | >50             | >50             | 0.042           | >50             |
| T251-18                             | CRF02_AG       | >50             | >50             | >50             | >50             | >50             | >50             |
| T278-50                             | CRF02_AG       | >50             | >50             | >50             | >50             | 11.1            | >50             |
| T255-34                             | CRF02_AG       | >50             | >50             | >50             | >50             | >50             | >50             |
| 211-9                               | CRF02_AG       | >50             | >50             | >50             | >50             | 0.057           | 0.017           |
| 235-47                              | CRF02_AG       | >50             | >50             | 0.734           | 2.6             | 16.4            | >50             |
| X1193_c1                            | G              | >50             | >50             | 0.018           | 0.026           | >50             | >50             |
| P0402_c2_11                         | G              | 12.7            | >50             | >50             | >50             | >50             | >50             |
| X1254_c3                            | G              | 0.926           | >50             | 0.046           | 11.4            | >50             | >50             |
| X2088_c9                            | G              | >50             | >50             | >50             | >50             | >50             | >50             |
| X2131_C1_B5                         | G              | >50             | 30.9            | >50             | >50             | >50             | >50             |
| P1981_CS_3                          | G              | >50             | >50             | 1.1             | 17.2            | >50             | >50             |
| X1632_S2_B10                        | G              | 0.077           | >50             | 0.044           | 0.822           | >50             | >50             |
| 3016.v5.c45                         | D              | >50             | >50             | >50             | 20.0            | >50             | >50             |
| A07412M1.vrc12                      | D              | >50             | >50             | 0.115           | 1.6             | >50             | >50             |
| 231965.c01                          | D              | >50             | >50             | 2.3             | 0.153           | 0.054           | 0.768           |
| 231966.c02                          | D              | >50             | >50             | 0.027           | 0.068           | >50             | >50             |
| 3817.v2.c59                         | CD             | >50             | >50             | 13.4            | >50             | 0.290           | 0.181           |
| 6480.v4.c25                         | CD             | 1.5             | >50             | 0.067           | 0.178           | 0.130           | 0.068           |
| 6952.v1.c20                         | CD             | >50             | >50             | >50             | >50             | >50             | >50             |
| 6811.v7.c18                         | CD             | 0.896           | 0.528           | 0.007           | 0.120           | >50             | >50             |
| 89-F1_2_25                          | CD             | >50             | >50             | >50             | >50             | >50             | >50             |
| 3301.v1.c24                         | AC             | 45.3            | >50             | >50             | 0.391           | >50             | >50             |
| 6041.v3.c23                         | AC             | 0.261           | 0.424           | >50             | >50             | >50             | >50             |
| 6540.v4.c1                          | AC             | 0.860           | 6.7             | >50             | >50             | 36.2            | >50             |
| 6545.v4.c1                          | AC             | 0.730           | 12.7            | 0.043           | >50             | 6.7             | >50             |
| 0815.v3.c3                          | ACD            | 0.486           | 0.377           | >50             | >50             | 0.055           | >50             |
| 3103.v3.c10                         | ACD            | >50             | 33.7            | 10.0            | 0.573           | >50             | >50             |
| <b>MAb breadth (%)</b>              | <b>N=120</b>   | <b>45 (38%)</b> | <b>33 (28%)</b> | <b>68 (57%)</b> | <b>69 (57%)</b> | <b>31 (26%)</b> | <b>24 (20%)</b> |
| <b>Clone breadth (%)</b>            |                | <b>50 (42%)</b> |                 | <b>78 (65%)</b> |                 | <b>37 (31%)</b> |                 |
| <b>MAb breadth (%)</b>              |                |                 |                 |                 |                 |                 |                 |
| <b>IC<sub>50</sub> &lt; 1 µg/mL</b> |                | <b>26 (22%)</b> | <b>18 (15%)</b> | <b>48 (40%)</b> | <b>42 (35%)</b> | <b>26 (22%)</b> | <b>18 (15%)</b> |
| <b>Clone breadth (%)</b>            |                |                 |                 |                 |                 |                 |                 |
| <b>IC<sub>50</sub> &lt; 1 µg/mL</b> |                | <b>27 (23%)</b> |                 | <b>59 (49%)</b> |                 | <b>29 (24%)</b> |                 |
| <b>MAb geometric mean (µg/mL)</b>   |                | <b>0.755</b>    | <b>1.408</b>    | <b>0.255</b>    | <b>0.702</b>    | <b>0.154</b>    | <b>0.199</b>    |
| <b>Clone geometric mean</b>         |                | <b>0.766</b>    |                 | <b>0.188</b>    |                 | <b>0.159</b>    |                 |

IC<sub>50</sub> color code  < 1  1.0 - 50  >50 (µg/mL)

**Table S2. Key contacts of the M1214\_N1 epitope on gp120 and their levels of conservation among 5,164 global Env sequences (version year 2016) retrieved from the Los Alamos HIV sequence database (<http://www.hiv.lanl.gov/>). Related to Figure 5.**

| Gp120 residues | Gp120 regions        | Buried surface ( $\text{\AA}^2$ ) <sup>#</sup> | Level of conservation* |
|----------------|----------------------|------------------------------------------------|------------------------|
| Q183           | V2                   | 14.9                                           | 0.572                  |
| D185           | V2                   | 34.1                                           | 0.365                  |
| I194           | V2                   | 15.2                                           | 0.806                  |
| N195           | V2                   | 11.3                                           | 0.670                  |
| N280           | C2, loop D           | 23.0                                           | 0.953                  |
| S365           | C3, CD4 binding loop | 18.7                                           | 0.787                  |
| G366           | C3, CD4 binding loop | 10.4                                           | 0.990                  |
| D368           | C3, CD4 binding loop | 25.9                                           | 0.992                  |
| L369           | C3, CD4 binding loop | 15.1                                           | 0.639                  |
| E370           | C3, CD4 binding loop | 32.8                                           | 0.987                  |
| Y384           | C3, CD4 binding site | 25.7                                           | 0.968                  |
| K421           | C4                   | 15.9                                           | 0.892                  |
| I424           | C4                   | 16.5                                           | 0.797                  |
| N425           | C4                   | 39.1                                           | 0.871                  |
| D457           | C4                   | 22.0                                           | 0.981                  |
| R469           | V5                   | 23.0                                           | 0.981                  |
| Geometric Mean |                      |                                                | 0.804                  |

<sup>#</sup>The buried surface areas were calculated using ICM software package (<https://www.molsoft.com/>), and only residues with surface contact areas  $> 10 \text{\AA}^2$  are listed.

\*Level of conservation was calculated using an entropy scoring method implemented in the R package bio3d.

**Table S3. M1214\_N1 Fab crystallographic data collection and refinement statistics.  
Related to Figure 5.**

| Protein                                              | M1214_N1 Fab         |
|------------------------------------------------------|----------------------|
| <b>PDB ID</b>                                        | 6VU2                 |
| <b>Data collection*</b>                              |                      |
| Space group                                          | P21                  |
| Cell dimensions                                      |                      |
| <i>a</i> , <i>b</i> , <i>c</i> (Å)                   | 50.7, 66.9, 70.2     |
| $\alpha$ , $\beta$ , $\gamma$ (°)                    | 90.0, 108.7, 90.0    |
| Resolution (Å)                                       | 27.4-2.2 (2.27-2.19) |
| <i>R</i> <sub>sym</sub> or <i>R</i> <sub>merge</sub> | 5.9 (40.7)           |
| <i>I</i> / $\sigma$ <i>I</i>                         | 10.6 (1.9)           |
| <i>CC</i> <sub>1/2</sub>                             | 0.996 (0.933)        |
| Completeness (%)                                     | 95.2 (72.0)          |
| Redundancy                                           | 2.4 (1.8)            |
| <b>Refinement</b>                                    |                      |
| Resolution (Å)                                       | 29.4-2.2             |
| No. reflections                                      | 37,801               |
| <i>R</i> <sub>work</sub> / <i>R</i> <sub>free</sub>  | 17.7/21.6            |
| No. atoms                                            |                      |
| Protein                                              | 3258                 |
| Water                                                | 187                  |
| Wilson B-factor                                      | 37.0                 |
| r.m.s. deviations                                    |                      |
| Bond lengths (Å)                                     | 0.007                |
| Bond angles (°)                                      | 0.87                 |
| Ramachandran statistics                              |                      |
| Favored (%)                                          | 97.2                 |
| Outliers (%)                                         | 0.47                 |

\*Values in parenthesis denote highest resolution shell.

**Table S4. Cryo-EM data collection, processing and refinement statistics.  
Related to Figure 5.**

| <b>M1214_N1 Fab/CH505 chimeric SOSIP.664<br/>(EMD-21456, PDB 6VY2)</b> |                   |
|------------------------------------------------------------------------|-------------------|
| <b>Data collection and processing</b>                                  |                   |
| Microscope                                                             | FEI Talos Arctica |
| Camera                                                                 | Gatan K2 Summit   |
| Magnification                                                          | 36,000            |
| Voltage (kV)                                                           | 200               |
| Electron exposure (e <sup>-</sup> /Å <sup>2</sup> )                    | 80                |
| Defocus range (µm)                                                     | -1.5 to -3.5      |
| Pixel size (Å)                                                         | 1.16              |
| Initial particle (no.)                                                 | 209,276           |
| Final particle (no.)                                                   | 94,839            |
| Symmetry imposed                                                       | C3                |
| Map resolution (masked, Å)                                             | 4.86              |
| FSC threshold                                                          | 0.143             |
| Map sharpening <i>B</i> factor (Å <sup>2</sup> )                       | -201.5            |
| <b>Refinement</b>                                                      |                   |
| Initial models used (PDB ID)                                           | 6UDA, 6VU2        |
| <b>Model composition</b>                                               |                   |
| Non-hydrogen atoms (no.)                                               | 21429             |
| Protein residues (no.)                                                 | 2442              |
| Sugar residues (no.)                                                   | 180               |
| <b>RMSD</b>                                                            |                   |
| Bond lengths (Å)                                                       | 0.006             |
| Bond angles (°)                                                        | 0.905             |
| <b>Validation</b>                                                      |                   |
| Clashscore                                                             | 18.0              |
| Poor rotamers (%)                                                      | 5.0               |
| <b>Ramachandran statistics (%)</b>                                     |                   |
| Favored                                                                | 93.8              |
| Allowed                                                                | 5.7               |
| Outliers                                                               | 0.5               |

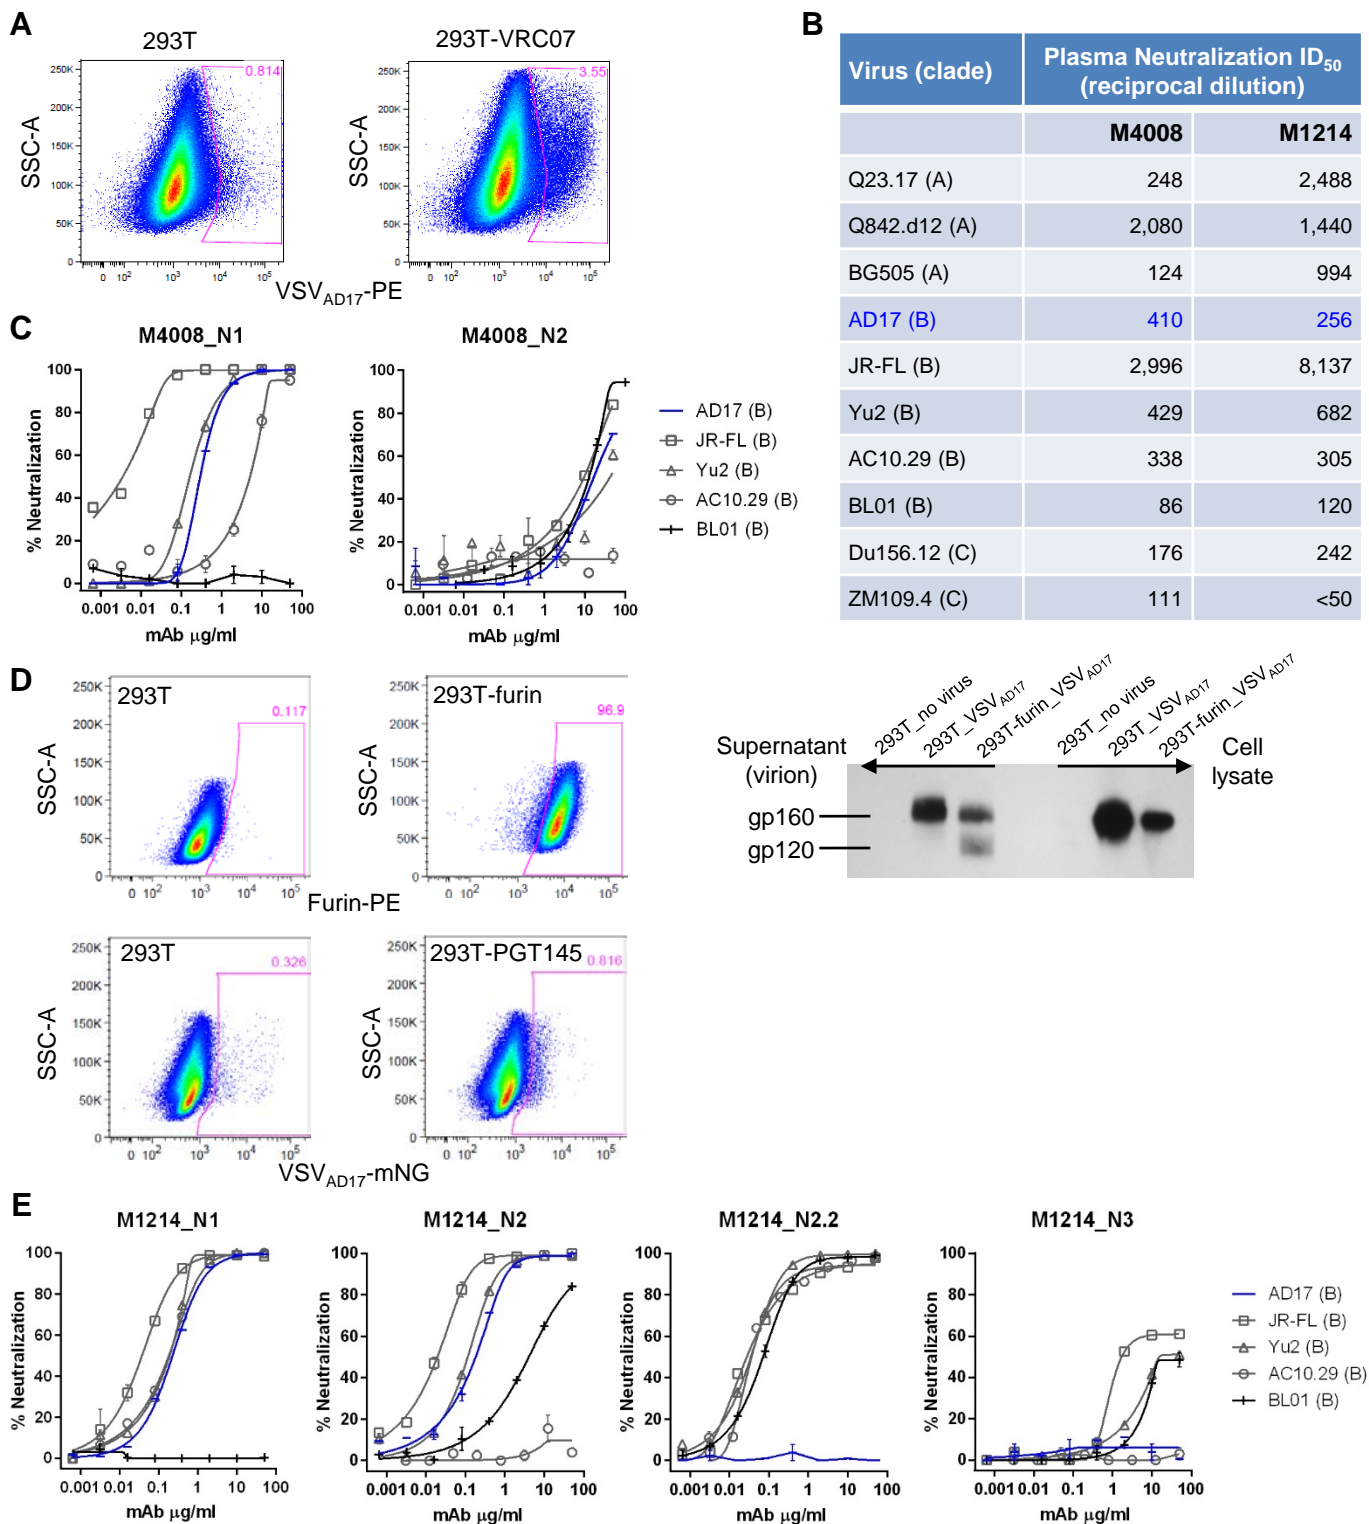

**Figure S1. Evaluation of VSV<sub>AD17</sub> as B cell probe for HIV-1 bNAbs isolation. Related to Figure 1.**

(A) Flow cytometry analysis of VSV<sub>AD17</sub>-PE binding to 293T cells and to 293T cells expressing membrane-bound VRC07 (293T-VRC07). SSC-A: side-scatter area.

(B) Neutralization ID<sub>50</sub>, shown as plasma reciprocal dilution, of two donors from the Montreal HIV-1 infection cohort, against 10 HIV-1 Env strains as indicated, with the probe strain AD17 in blue.

(C) Neutralization screening of bNAbs from donor M4008 against five clade B viruses as indicated.

(D) Flow cytometry analysis of furin expression in 293T cells with and without stable transduction of the human furin gene; Western blot with HIVIG showing the uncleaved gp160 and cleaved gp120 in virion and in cell lysate from 293T versus 293T-furin; flow cytometry analysis of VSV<sub>AD17</sub>-mNG staining of 293T cells and 293T cells expressing membrane-bound PGT145 (293T-PGT145).

(E) Neutralization screening of bNAbs from donor M1214 against five clade B viruses as indicated, with the probe strain AD17 in blue.

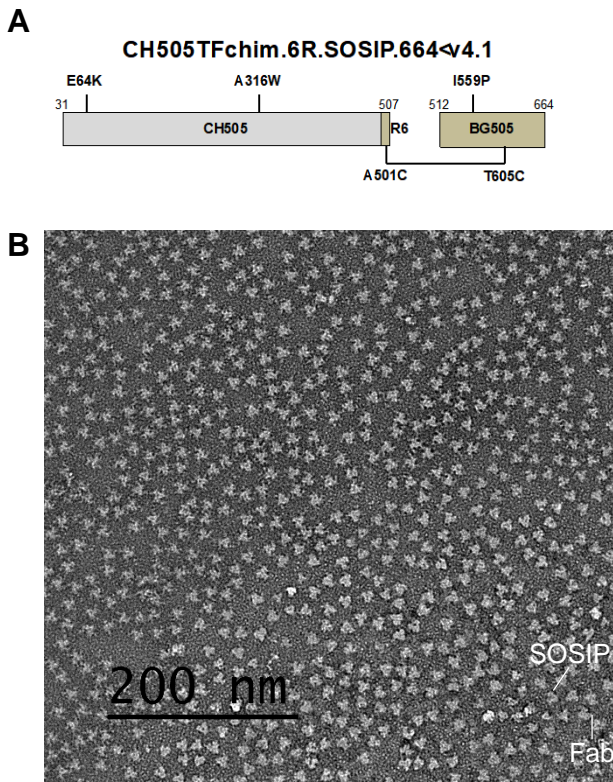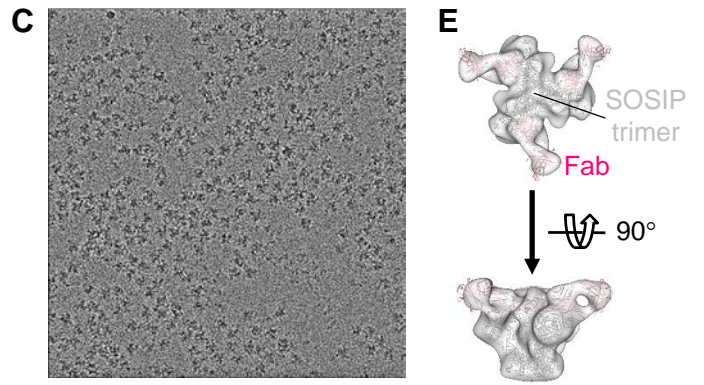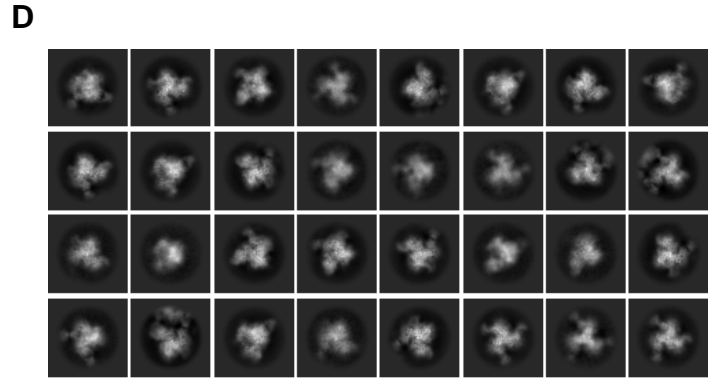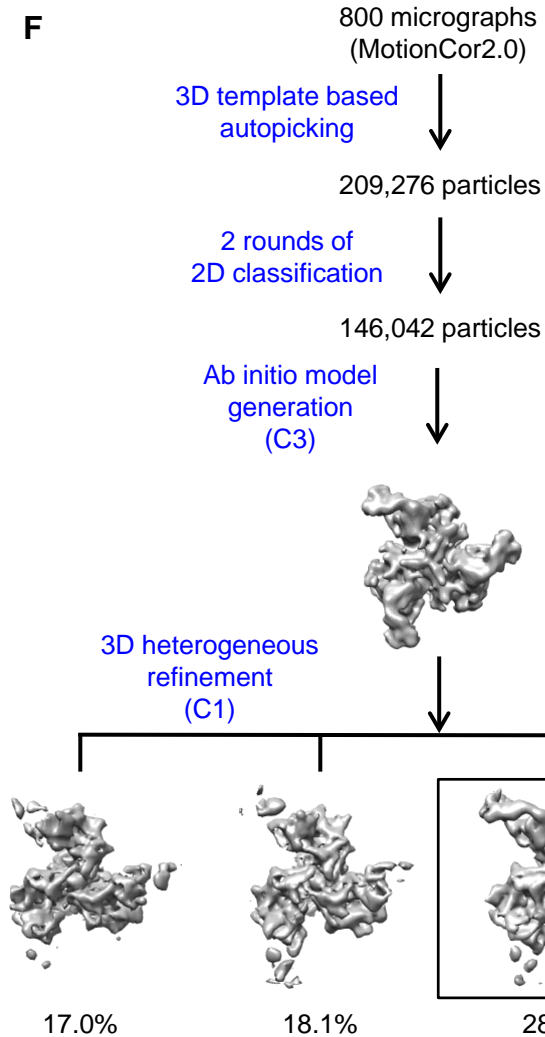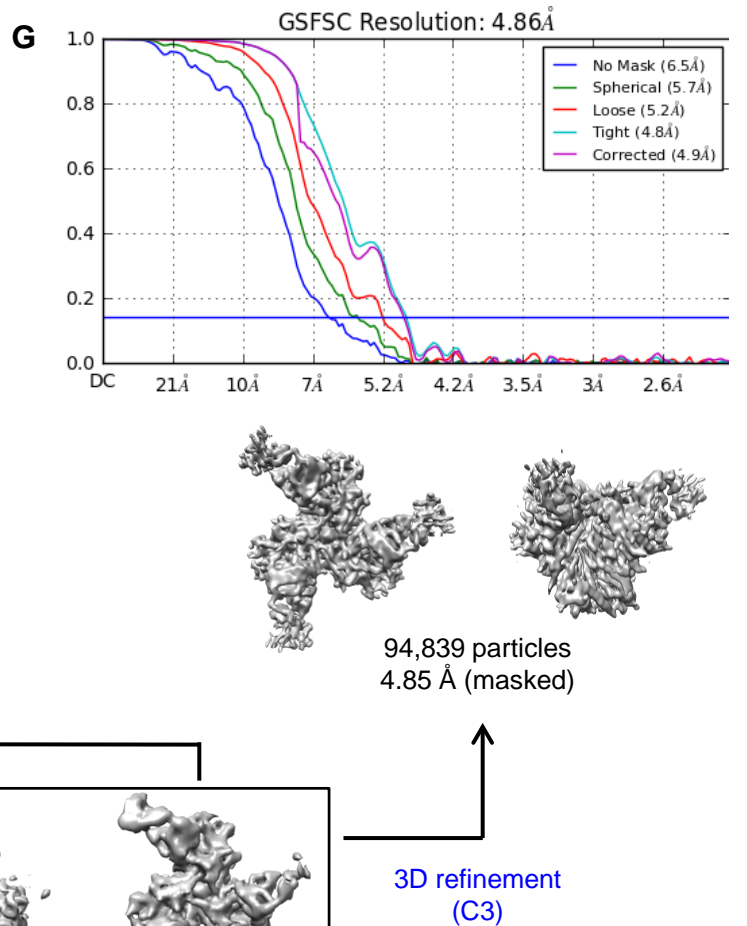



**Figure S2. Cryo-EM sample preparation, data collection and processing. Related to Figure 5.**

- (A) Schematic construct of the chimeric CH505 SOSIP, in which the sequence of gp41 along with the C-terminal portion of gp120 was replaced by that of BG505.
- (B) A representative micrograph of the negative staining of M1214\_N1 Fab/CH505 SOSIP complex, showing the homogeneity of the complex sample, in which more than 90% of the SOSIP trimer was bound with three Fabs (inset) estimated by 2D class averaging.
- (C) A representative cryo-EM micrograph of M1214\_N1 Fab/CH505 SOSIP complex.
- (D) 2D averaging of cryo-EM particle images shows the structural features for both SOSIP trimer and Fab.
- (E) 3D initial model of the M1214\_N1 Fab/CH505 SOSIP complex, fitted with a CH505 SOSIP trimer (PDB 6UDA) and three crystallographic M1214\_N1 Fabs (PDB 6VU2).
- (F) Workflow of data processing performed using cryoSPAC.
- (G) FSC curve for 3D reconstruction of the cryo-EM map. The average resolution is estimated to be 4.86 Å on the basis of the FSC value of 0.143.

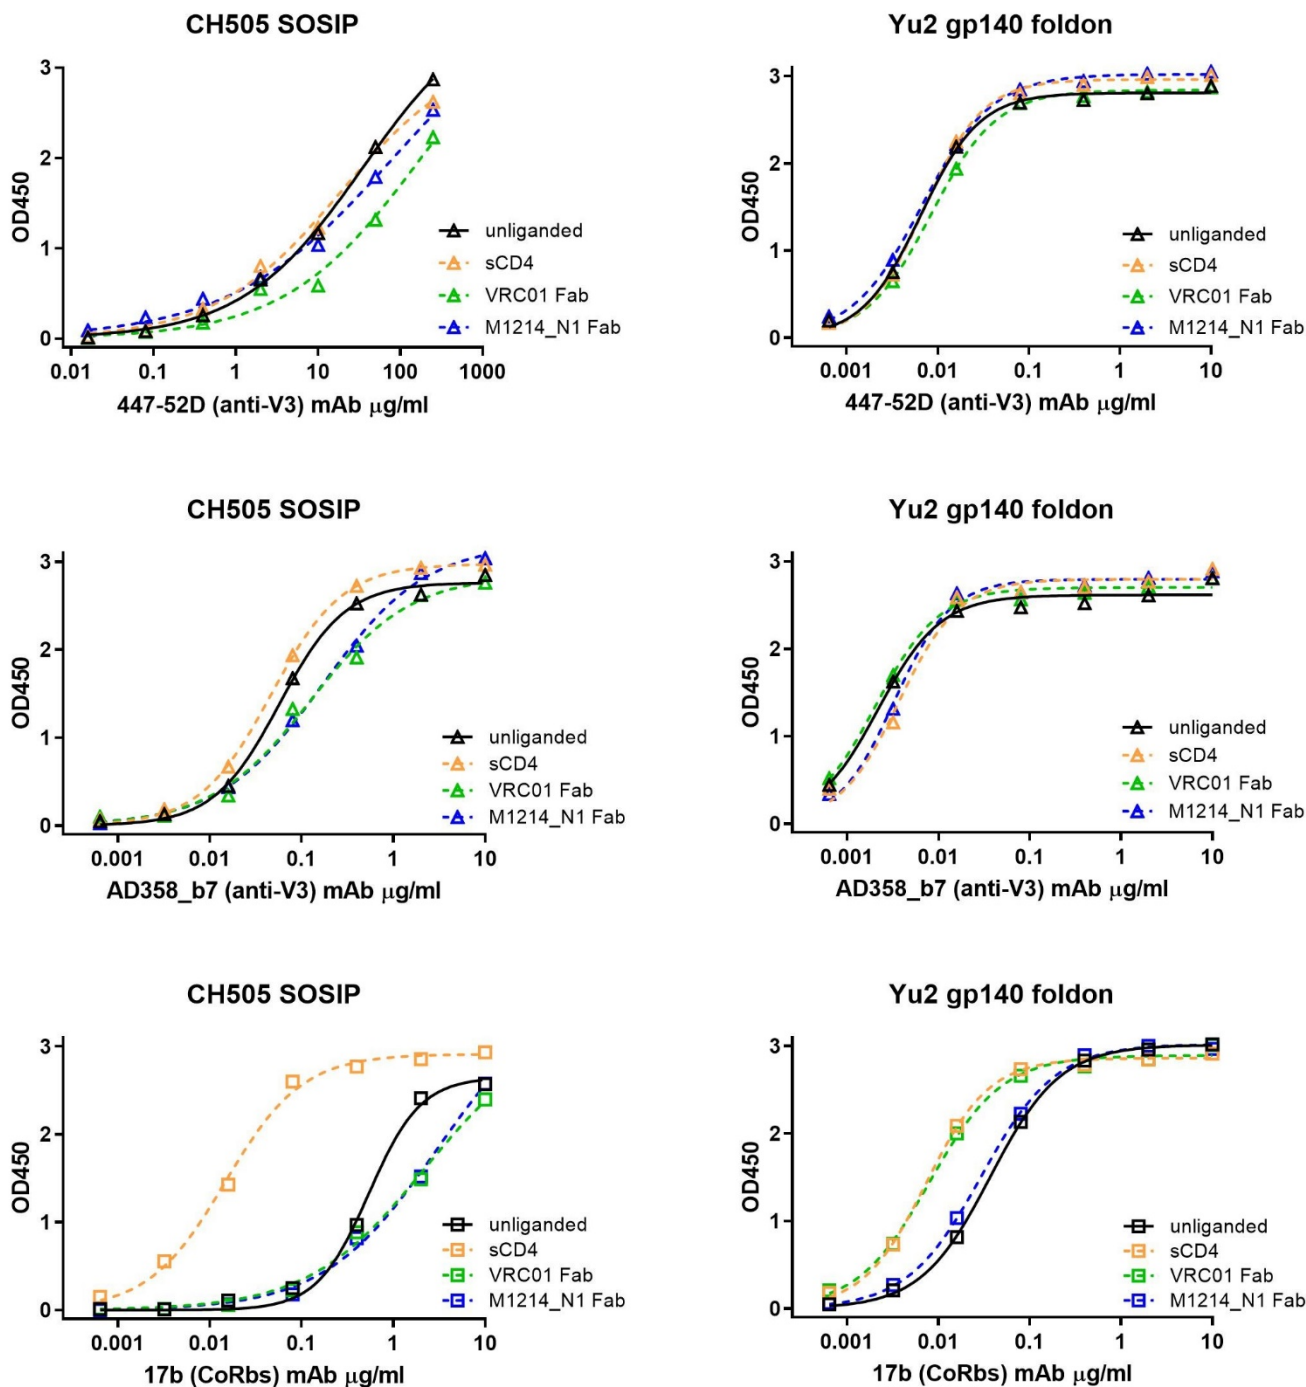

**Figure S3. Assessment of the conformational change of CH505 SOSIP upon M1214\_N1 Fab binding. Related to Figure 5.**

The conformational change of CH505 SOSIP (left) upon 2-domain sCD4, VRC01 Fab, and M1214\_N1 Fab binding was each assessed by ELISA with the anti-V3 crown mAbs 447-52D (top) and AD358\_b7 (middle), as well as the coreceptor-binding site (CoRbs) mAb 17b (bottom), all of which preferentially recognize the CD4-induced “open” Env conformation. Yu2 gp140 foldon (right) was included as a control for gp140 that adopts an “open” Env conformation.
